# Supplementary material
Source: Research Square preprint supplement (doi:10.21203/rs.3.rs-9077331/v1)
Supplement: Supplementary file 1 [file 5374543fbcd35da53aa37e96.docx]

## Appendix 1. Flow Chart – Sample selection

**Figure A1.** Flow chart - sample selection


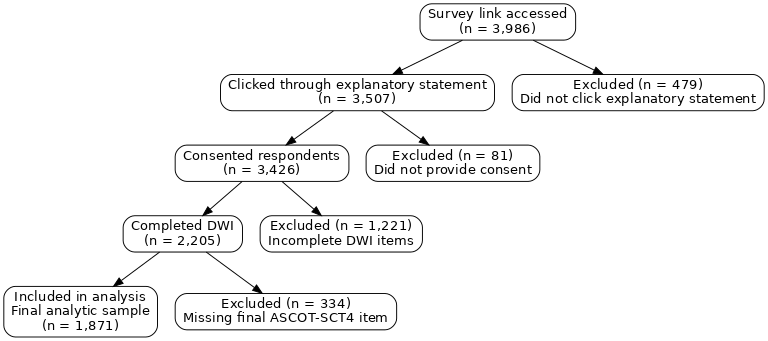


## Appendix 2. Detailed Sample Characteristics

**Table A2.** Sample characteristics

|  | **Freq/mean** | **Prop/(SD)** |
| --- | --- | --- |
| **Age,** Mean (SD) (N=1854) | 40.2 | 18.4 |
| **First Nations** (%) (N=1860) | 79 | 4% |
| **Speaks English only** (%) (N=1838) | 1702 | 93% |
| **Gender** (N=1871) (%) |  |  |
| Male | 828 | 44% |
| Female | 942 | 50% |
| Non-binary | 72 | 4% |
| Prefer not to say | 29 | 2% |
| **Marital status** (N=1861) |  |  |
| Married or de facto, or having a partner | 450 | 24% |
| Single | 1101 | 59% |
| Widowed/divorced/separated | 248 | 13% |
| Prefer not to say | 62 | 3% |
| **Education** (N=1859) |  |  |
| No school / Year 8 or less | 62 | 3% |
| High school | 765 | 41% |
| Diploma or certificate or similar | 307 | 17% |
| University and over | 330 | 18% |
| Other | 349 | 19% |
| Prefer not to say | 46 | 3% |
| **Employment*** (N=1855) |  |  |
| Full-time | 110 | 6% |
| Part-time | 247 | 13% |
| Unemployed | 446 | 24% |
| Retired/pensioner | 533 | 29% |
| Home/duties/home carer | 96 | 5% |
| Student | 332 | 18% |
| Other | 342 | 18% |
| **Disability groups*** (N=1871) |  |  |
| Sensory | 609 | 33% |
| Intellectual | 706 | 38% |
| Physical | 677 | 36% |
| Psychosocial | 856 | 46% |
| Head Injury, Stroke, Acquired Brain Injury | 289 | 14% |
| Autism | 786 | 42% |
| Other | 386 | 21% |
| *Percentages add up to more than 100% because participants could tick more than one option. | | |

## Appendix 3. Comparison of mean +/- SD and median utilities according to disability groups

|  |  | **DWI-Standard** | | **ASCOT-SCT4** | |  | **DWI-EE** | | **ASCOT-SCT4-ER** | |
| --- | --- | --- | --- | --- | --- | --- | --- | --- | --- | --- |
| **Disability group** | **N** | **Mean ± SD** | **Median** | **Mean ± SD** | **Median** | **N** | **Mean ± SD** | **Median** | **Mean ± SD** | **Median** |
| Sensory | 395 | 0.791 ± 0.160 | 0.842 | 0.680 ± 0.244 | 0.730 | 214 | 0.784 ± 0.165 | 0.837 | 0.621 ± 0.237 | 0.690 |
| Intellectual | 447 | 0.835 ± 0.133 | 0.875 | 0.746 ± 0.216 | 0.800 | 259 | 0.795 ± 0.167 | 0.846 | 0.635 ± 0.242 | 0.690 |
| Physical | 489 | 0.789 ± 0.156 | 0.836 | 0.653 ± 0.248 | 0.700 | 188 | 0.780 ± 0.166 | 0.824 | 0.604 ± 0.266 | 0.665 |
| Psychosocial | 600 | 0.754 ± 0.163 | 0.796 | 0.639 ± 0.250 | 0.685 | 256 | 0.747 ± 0.175 | 0.789 | 0.582 ± 0.248 | 0.625 |
| ABI | 174 | 0.818± 0.147 | 0.864 | 0.726 ± 0.241 | 0.780 | 95 | 0.804 ± 0.161 | 0.840 | 0.656 ± 0.248 | 0.750 |
| Autism | 569 | 0.784 ± 0.154 | 0.832 | 0.684 ± 0.238 | 0.730 | 217 | 0.783 ± 0.158 | 0.836 | 0.620 ± 0.230 | 0.680 |
| Other | 281 | 0.822 ± 0.141 | 0.866 | 0.712 ± 0.235 | 0.745 | 105 | 0.780 ± 0.181 | 0.855 | 0.602 ± 0.259 | 0.650 |

**Table A3.** Comparison of mean +/- SD and median (IQR) utilities according to disability groups

## Appendix 4. Spearman item response correlations between DWI and ASCOT-SCT4 items across age groups for Standard and English/Read versions

**Table A4.1** Spearman item response correlations between DWI-Standard and ASCOT-SCT4 items across adult and young samples

|  |  | **DWI Standard version (N=864, adults sample)** | | | | | | | | | | | | | | |
| --- | --- | --- | --- | --- | --- | --- | --- | --- | --- | --- | --- | --- | --- | --- | --- | --- |
|  |  | **Relationship** | | | **Personal care** | **Everyday activities** | **Meaningful life** | **Housing** | **Physical health** | **Mental health** | **Learning** | **Respect & Dignity** | **Safety** | **Finances** | **Work** |
|  |  | **family** | **friends** | **support team** |
| **ASCOT -SCT4** | **Control over daily life** | 0.22 | 0.31 | 0.28 | 0.33 | 0.34 | 0.42 | 0.35 | 0.23 | 0.33 | 0.36 | 0.31 | 0.37 | 0.31 | 0.33 |
| **Personal cleanliness and comfort** | 0.30 | 0.33 | 0.32 | 0.53 | 0.42 | 0.39 | 0.39 | 0.31 | 0.39 | 0.30 | 0.31 | 0.37 | 0.29 | 0.30 |
| **Food and drink** | 0.36 | 0.31 | 0.28 | 0.44 | 0.39 | 0.37 | 0.39 | 0.25 | 0.31 | 0.27 | 0.35 | 0.37 | 0.38 | 0.27 |
| **Safety** | 0.40 | 0.35 | 0.28 | 0.33 | 0.37 | 0.38 | 0.43 | 0.34 | 0.40 | 0.27 | 0.42 | 0.62 | 0.42 | 0.32 |
| **Social participation and involvement** | 0.35 | 0.55 | 0.33 | 0.36 | 0.45 | 0.50 | 0.42 | 0.36 | 0.44 | 0.40 | 0.39 | 0.43 | 0.40 | 0.39 |
| **Occupation** | 0.34 | 0.40 | 0.31 | 0.40 | 0.49 | 0.59 | 0.46 | 0.40 | 0.44 | 0.44 | 0.38 | 0.43 | 0.42 | 0.45 |
| **Accommodation cleanliness and comfort** | 0.41 | 0.36 | 0.36 | 0.43 | 0.47 | 0.43 | 0.48 | 0.35 | 0.38 | 0.29 | 0.40 | 0.43 | 0.44 | 0.30 |
| **Dignity** | 0.20 | 0.19 | 0.33 | 0.18 | 0.27 | 0.29 | 0.28 | 0.22 | 0.21 | 0.18 | 0.29 | 0.30 | 0.18 | 0.20 |
|  |  | **DWI-EE version (N=362, young sample)** | | | | | | | | | | | | | |
| **ASCOT -SCT4-ER** | **Control over daily life** | 0.18 | 0.22 | 0.17 | 0.23 | 0.24 | 0.27 | 0.29 | 0.23 | 0.23 | 0.30 | 0.26 | 0.28 | 0.24 | 0.32 |
| **Personal cleanliness and comfort** | 0.26 | 0.31 | 0.17 | 0.56 | 0.39 | 0.35 | 0.37 | 0.35 | 0.38 | 0.28 | 0.29 | 0.39 | 0.35 | 0.29 |
| **Food and drink** | 0.31 | 0.16 | 0.13 | 0.23 | 0.23 | 0.14 | 0.32 | 0.25 | 0.19 | 0.12 | 0.22 | 0.20 | 0.30 | 0.21 |
| **Accommodation cleanliness and comfort** | 0.32 | 0.25 | 0.27 | 0.27 | 0.30 | 0.24 | 0.33 | 0.29 | 0.30 | 0.13 | 0.31 | 0.48 | 0.33 | 0.33 |
| **Safety** | 0.18 | 0.50 | 0.20 | 0.26 | 0.39 | 0.38 | 0.25 | 0.26 | 0.34 | 0.32 | 0.32 | 0.28 | 0.26 | 0.37 |
| **Social participation and involvement** | 0.27 | 0.36 | 0.20 | 0.25 | 0.36 | 0.44 | 0.34 | 0.26 | 0.34 | 0.36 | 0.35 | 0.35 | 0.36 | 0.42 |
| **Occupation** | 0.33 | 0.18 | 0.19 | 0.27 | 0.33 | 0.23 | 0.41 | 0.32 | 0.29 | 0.15 | 0.21 | 0.35 | 0.31 | 0.25 |
|  | **Dignity** | 0.22 | 0.14 | 0.35 | 0.09 | 0.18 | 0.20 | 0.13 | 0.18 | 0.23 | 0.17 | 0.21 | 0.21 | 0.15 | 0.16 |

**Table A4.2** Spearman item response correlations between DWI-EE and ASCOT-SCT4-ER items across adult and young samples

|  |  | **Disability Wellbeing Index-EE (Adult sample, N=342)** | | | | | | | | | | | | | | |
| --- | --- | --- | --- | --- | --- | --- | --- | --- | --- | --- | --- | --- | --- | --- | --- | --- |
|  |  | **Relationship** | | | **Personal care** | **Everyday activities** | **Meaningful life** | **Housing** | **Physical health** | **Mental health** | **Learning** | **Respect & Dignity** | **Safety** | **Finances** | **Work** |
|  |  | **family** | **friends** | **support team** |
| **ASCOT -SCT4** | **Control over daily life** | 0.34 | 0.32 | 0.33 | 0.36 | 0.44 | 0.44 | 0.39 | 0.38 | 0.38 | 0.37 | 0.39 | 0.41 | 0.37 | 0.34 |
| **Personal cleanliness and comfort** | 0.43 | 0.43 | 0.35 | **0.50** | 0.47 | 0.39 | 0.47 | 0.44 | 0.46 | 0.35 | 0.44 | 0.46 | 0.41 | 0.43 |
| **Food and drink** | 0.35 | 0.30 | 0.29 | 0.34 | 0.37 | 0.32 | 0.39 | 0.27 | 0.36 | 0.25 | 0.37 | 0.44 | 0.37 | 0.35 |
| **Safety** | 0.39 | 0.32 | 0.33 | 0.35 | 0.41 | 0.32 | 0.38 | 0.28 | 0.36 | 0.29 | 0.35 | 0.41 | 0.39 | 0.39 |
| **Social participation and involvement** | 0.46 | 0.47 | 0.31 | 0.36 | 0.44 | 0.36 | 0.48 | 0.37 | 0.45 | 0.27 | 0.42 | 0.61 | 0.42 | 0.34 |
| **Occupation** | 0.47 | 0.52 | 0.42 | 0.44 | 0.52 | 0.53 | 0.44 | 0.44 | 0.44 | 0.45 | 0.50 | 0.49 | 0.36 | 0.47 |
| **Accommodation cleanliness and comfort** | 0.38 | 0.39 | 0.35 | 0.42 | 0.52 | 0.56 | 0.43 | 0.42 | 0.44 | 0.41 | 0.40 | 0.44 | 0.37 | 0.38 |
| **Dignity** | 0.35 | 0.29 | 0.45 | 0.28 | 0.33 | 0.32 | 0.37 | 0.24 | 0.30 | 0.31 | 0.42 | 0.31 | 0.15 | 0.35 |
|  |  | **Disability Wellbeing Index -EE (Young sample, N=158)** | | | | | | | | | | | | | |
| **ASCOT -SCT4-ER** | **Control over daily life** | 0.48 | 0.35 | 0.38 |  | 0.26 | 0.40 | 0.41 | 0.22 | 0.37 | 0.37 | 0.37 | 0.25 | 0.26 | 0.48 |
| **Personal cleanliness and comfort** | 0.37 |  | 0.32 | 0.49 | 0.36 | 0.34 | 0.23 | 0.31 | 0.32 |  |  | 0.23 | 0.24 | 0.37 |
| **Food and drink** | 0.25 |  | 0.21 | 0.21 |  | 0.21 | 0.23 |  |  |  | 0.24 | 0.32 | 0.32 | 0.25 |
| **Accommodation cleanliness and comfort** | 0.28 |  |  | 0.30 | 0.29 | 0.23 | 0.34 | 0.32 | 0.23 |  |  | 0.29 | 0.36 | 0.28 |
| **Safety** |  | 0.26 | 0.26 | 0.29 | 0.28 | 0.23 | 0.27 | 0.26 | 0.42 |  | 0.37 | 0.41 | 0.34 | 0.26 |
| **Social participation and involvement** | 0.31 | 0.51 | 0.26 | 0.21 | 0.25 | 0.41 | 0.31 | 0.23 | 0.31 | 0.40 | 0.30 |  |  | 0.31 |
| **Occupation** | 0.35 | 0.39 | 0.24 | 0.24 | 0.23 | 0.38 | 0.35 | 0.25 | 0.29 | 0.41 | 0.34 | 0.31 | 0.25 | 0.35 |
|  | **Dignity** | 0.48 | 0.35 | 0.38 |  | 0.26 | 0.40 | 0.41 | 0.22 | 0.37 | 0.37 | 0.37 | 0.25 | 0.26 | 0.48 |

## Appendix 5. Explanatory Factor Analysis Results

Promax-rotated factor analysis identified two correlated factors (r = 0.67). The first factor reflected broad personal wellbeing and functioning, with strong loadings from DWI items. The second factor was characterised primarily by ASCOT-SCT4 items capturing social care-related quality of life. Despite a dominant general factor, the two-factor solution provided improved model fit and conceptual interpretability. As shown in Table A5.1, most DWI items loaded strongly on Factor 1, including meaningful life (0.80), mental health (0.72), learning (0.72), work (0.62), and relationships with friends (0.59). Additional DWI items with moderate loadings on this factor included physical health (0.53), everyday activities (0.58), dignity (0.47), and safety (0.40). Only one DWI item, personal care (0.37), showed its primary loading on Factor 2. In contrast, the ASCOT-SCT4 items predominantly loaded on Factor 2, including food and drink (0.67), accommodation cleanliness and comfort (0.68), personal cleanliness and comfort (0.52), and safety (0.51). Control over daily life (0.34) and social participation and involvement (0.51) also clustered on Factor 1. Together, these loadings indicate a clear pattern of separation between the DWI and ASCOT-SCT4 constructs across the two extracted factors.

**Table. A5.1**. Oblique (Promax-rotated) factor loadings for the items of the DWI Standard and ASCOT-SCT4 (N=1328)

| **Measure** | **Item** | **Factor*** | |
| --- | --- | --- | --- |
|  |  | **1** | **2** |
| **DWI** | Relationships- Family | 0.33 |  |
|  | Relationships- Friends | 0.59 |  |
|  | Relationships- Support team | 0.41 |  |
|  | Personal care |  | 0.37 |
|  | Everyday activities | 0.58 |  |
|  | Meaningful life | 0.80 |  |
|  | Housing | 0.39 |  |
|  | Physical health | 0.53 |  |
|  | Mental health | 0.72 |  |
|  | Learning | 0.72 |  |
|  | Respect & dignity | 0.47 |  |
|  | Safety | 0.40 |  |
|  | Finances | 0.41 |  |
|  | Work | 0.62 |  |
| **ASCOT- SCT4** | Control over daily life | 0.34 |  |
|  | Personal cleanliness and comfort |  | 0.52 |
|  | Food and drink |  | 0.67 |
|  | Safety |  | 0.51 |
|  | Social participation and involvement | 0.51 |  |
|  | Occupation | 0.52 |  |
|  | Accommodation cleanliness and comfort |  | 0.68 |
|  | Dignity |  |  |

DWI, Disability Wellbeing Index; ASCOT-SCT4, Adult Social Care Outcomes Toolkit Self Complete *Only presented is the highest factor loading per item, which is also > 0.3028. ASCOT-SCT4’s Dignity item was not loaded to any of the factors.

As shown in Table A5.2, most DWI-EE items loaded strongly on Factor 1, including everyday activities (0.80), meaningful life (0.78), learning (0.77), mental health (0.68), physical health (0.62), and personal care (0.61). Moderately strong loadings were also observed for relationships with friends (0.57), relationships with support team (0.54), work (0.53), respect and dignity (0.53), and relationships with family (0.52), with housing showing the lowest loading among DWI-EE items on this factor (0.41). In contrast, ASCOT-SCT4-ER items predominantly loaded on Factor 2, including food and drink (0.78), accommodation cleanliness and comfort (0.68), personal cleanliness and comfort (0.47), control over daily life (0.44), and safety (0.49). Social participation and involvement (0.41) and occupation (0.43) also showed their primary loadings on Factor 1, reflecting some conceptual overlap with broader wellbeing domains. Dignity demonstrated the weakest ASCOT-SCT4-ER loading on Factor 2 (0.34). The factors were strongly correlated (r = 0.64), while maintaining enough unique variance to confirm they capture distinct dimensions of quality of life. Overall, these loadings demonstrate a clear separation between the DWI-EE and ASCOT-SCT4-ER constructs across the two extracted factors, consistent with the conceptual distinction between general wellbeing and social care–related quality-of-life domains.

**Table. A5.2**. Oblique (Promax-rotated) factor loadings for the items of the DWI-EE and ASCOT-SCT4-ER (N=543)

| **Measure** | **Item** | **Factor*** | |
| --- | --- | --- | --- |
|  |  | **1** | **2** |
| **DWI-EE** | Relationships- Family | 0.52 |  |
|  | Relationships- Friends | 0.57 |  |
|  | Relationships- Support team | 0.54 |  |
|  | Personal care | 0.61 |  |
|  | Everyday activities | 0.80 |  |
|  | Meaningful life | 0.78 |  |
|  | Housing | 0.41 |  |
|  | Physical health | 0.62 |  |
|  | Mental health | 0.68 |  |
|  | Learning | 0.77 |  |
|  | Respect & dignity | 0.53 |  |
|  | Safety |  | 0.43 |
|  | Finances |  | 0.38 |
|  | Work | 0.53 |  |
| **ASCOT- SCT4-ER** | Control over daily life |  | 0.44 |
|  | Personal cleanliness and comfort |  | 0.47 |
|  | Food and drink |  | 0.78 |
|  | Accommodation cleanliness and comfort |  | 0.68 |
|  | Social participation and involvement | 0.41 |  |
|  | Safety |  | 0.49 |
|  | Occupation |  | 0.43 |
|  | Dignity |  | 0.34 |

DWI-EE, Disability Wellbeing Index Easy English; ASCOT-SCT4-ER, Adult Social Care Outcomes Toolkit Self Complete Easy Read *Only presented is the highest factor loading per item, which is also > 0.3028.
